# Supplementary material
Source: PubMed Central journal article supplement (PMC2993218)

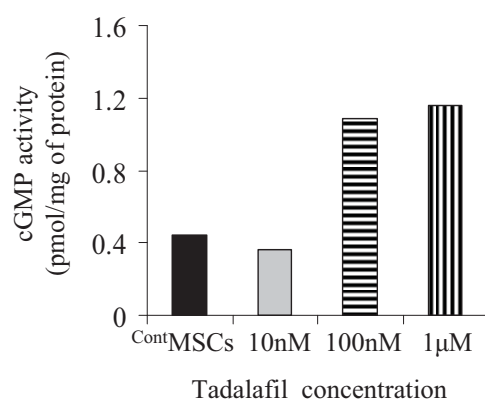

Supplement: figS1.pdf [file figS1.pdf]

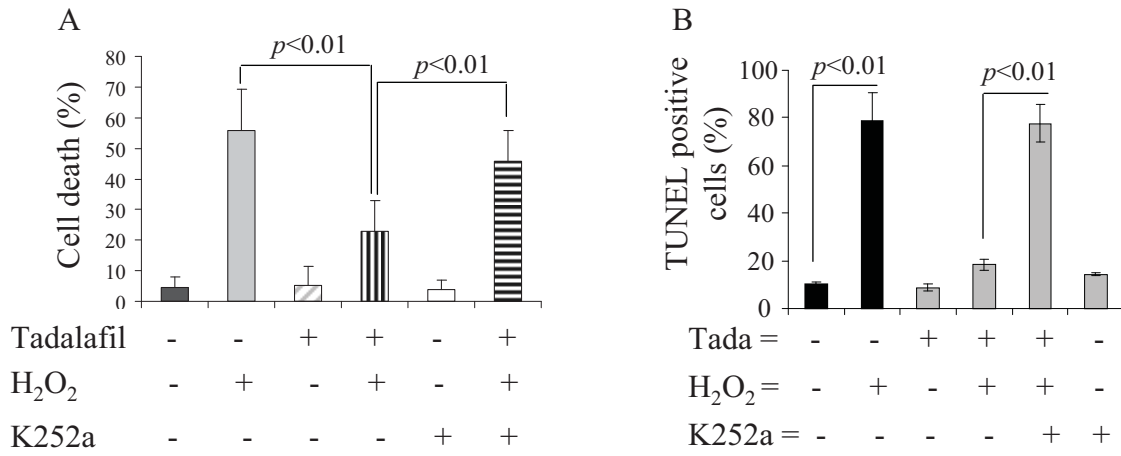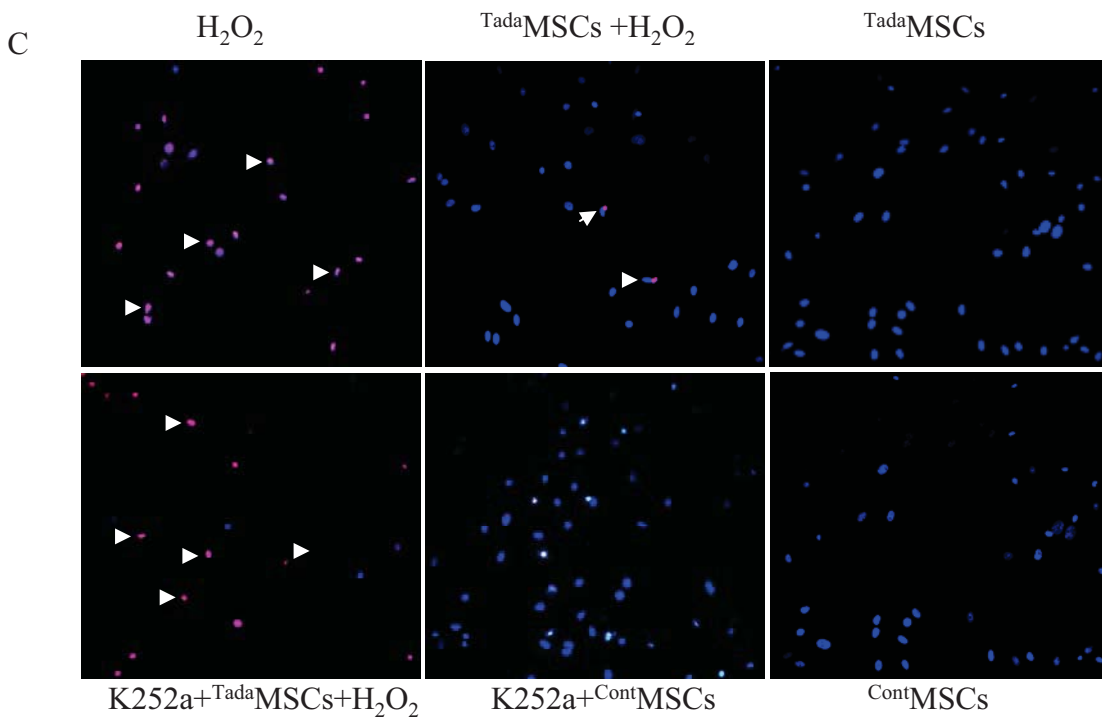

Supplement: figS2.pdf [file figS2.pdf]

### Supplement Figure 3.

**A)**

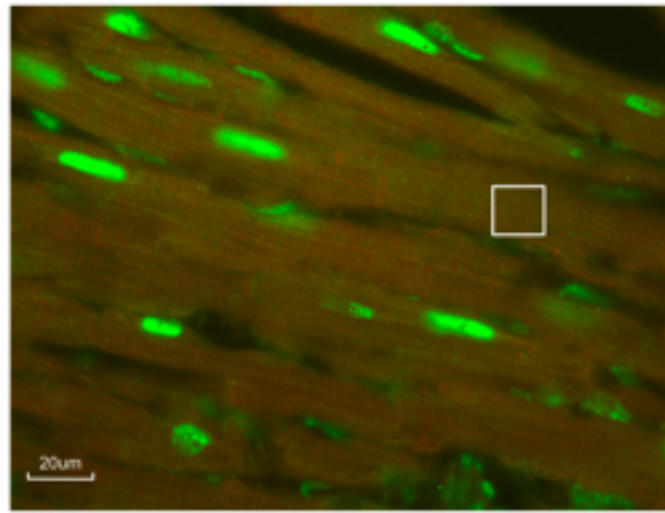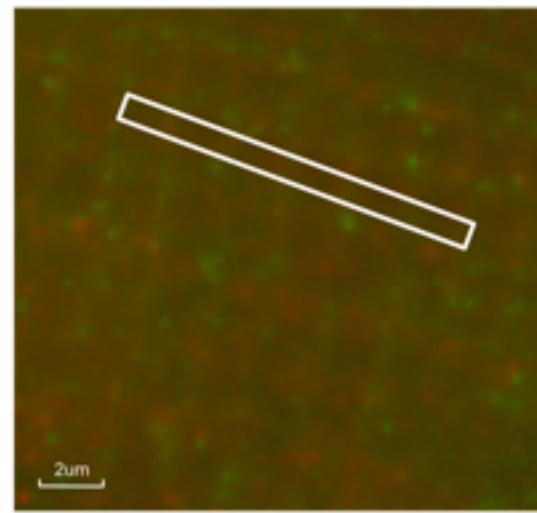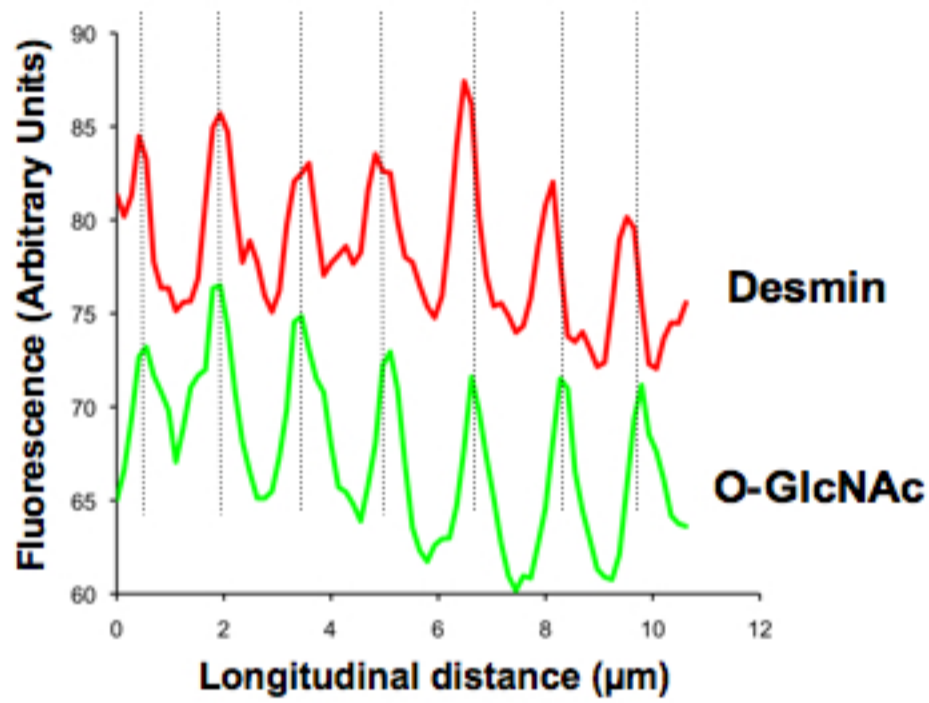

**B)**

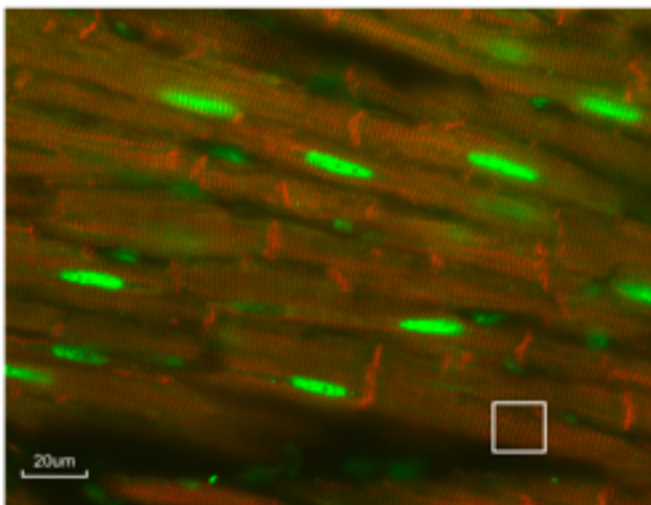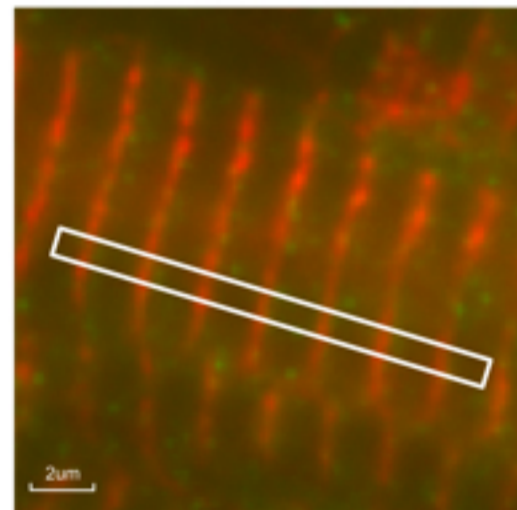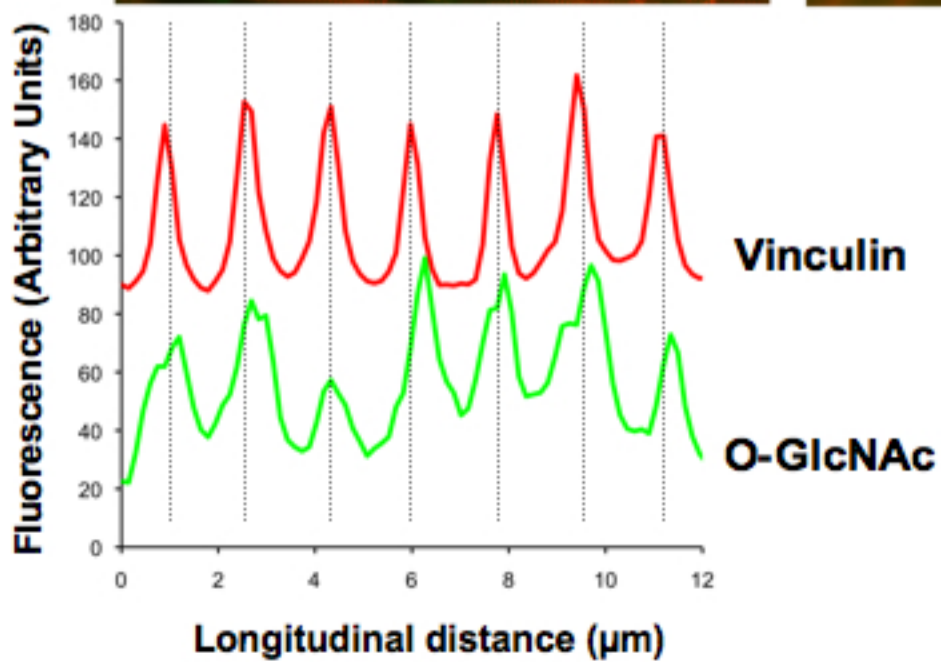

Supplement: figS3.pdf [file figS3.pdf]

Supplement Figure 4.

Original blots

A) Exposition time: 1 sec

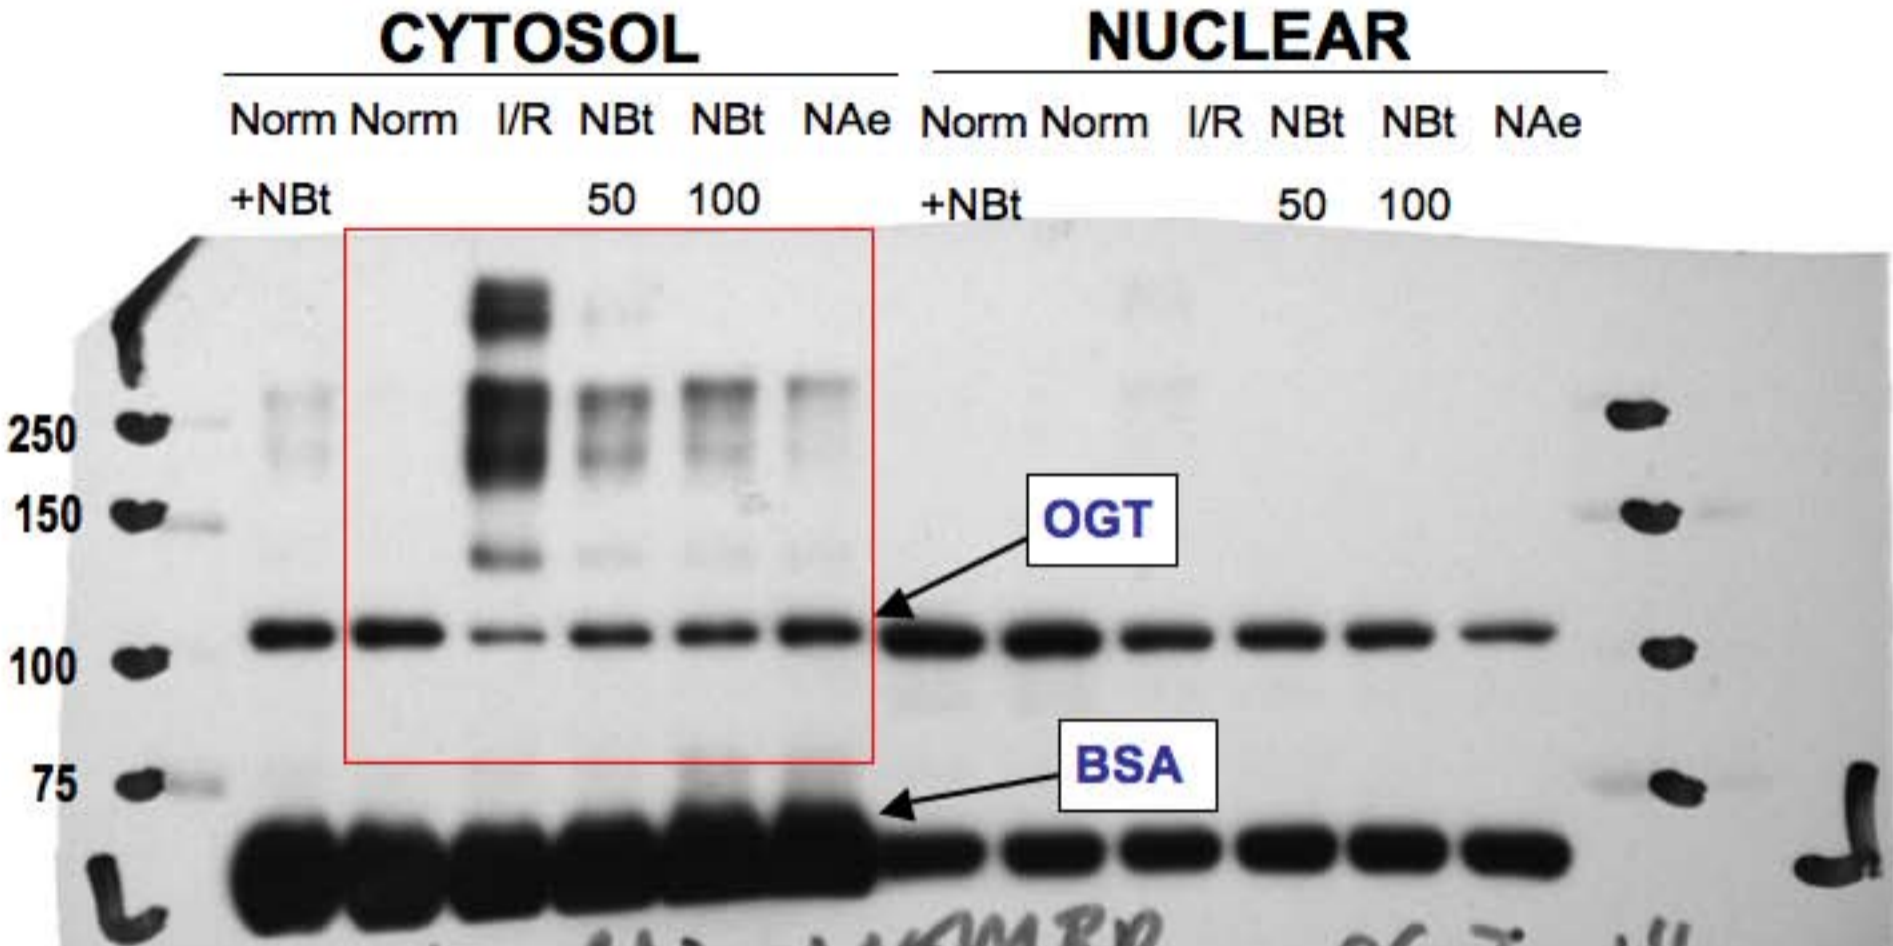

B) Exposition time: 10 sec

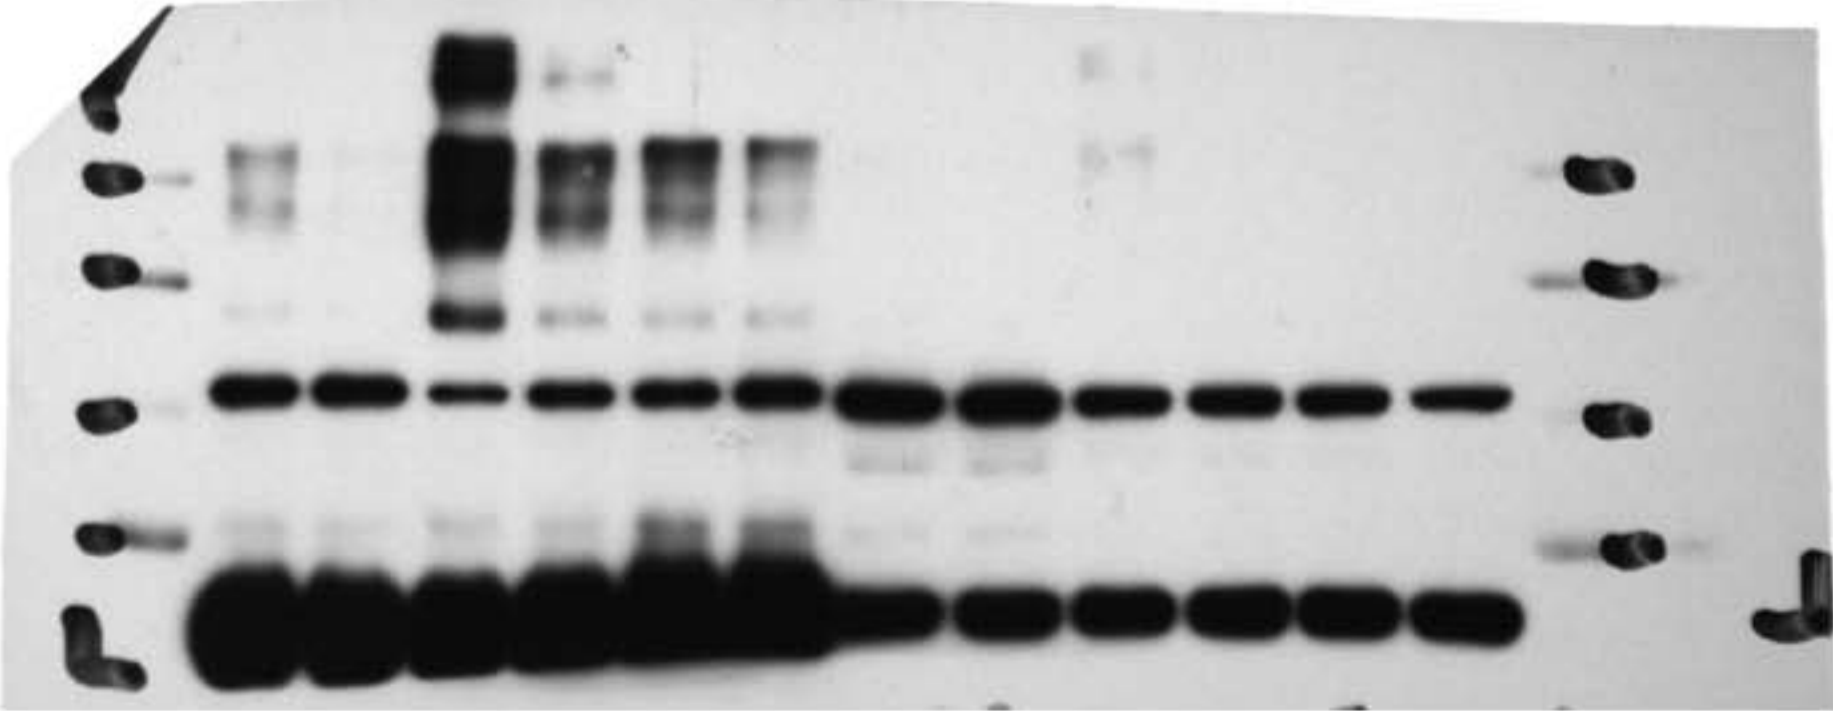

Supplement: figS4.pdf [file figS4.pdf]

**Supplement Figure 5.**

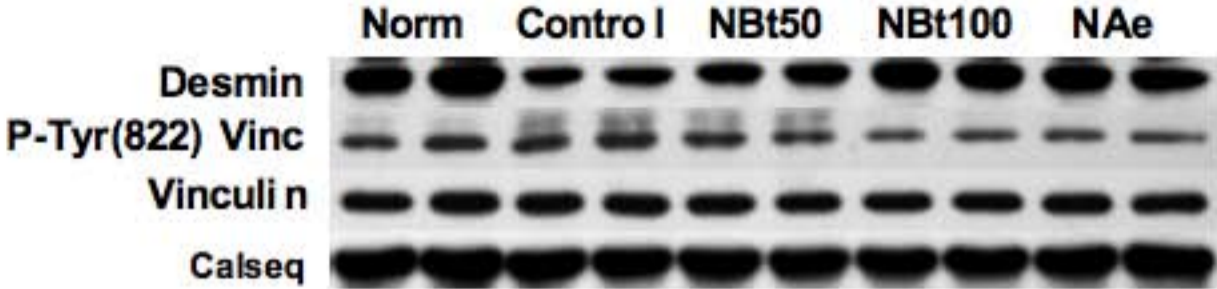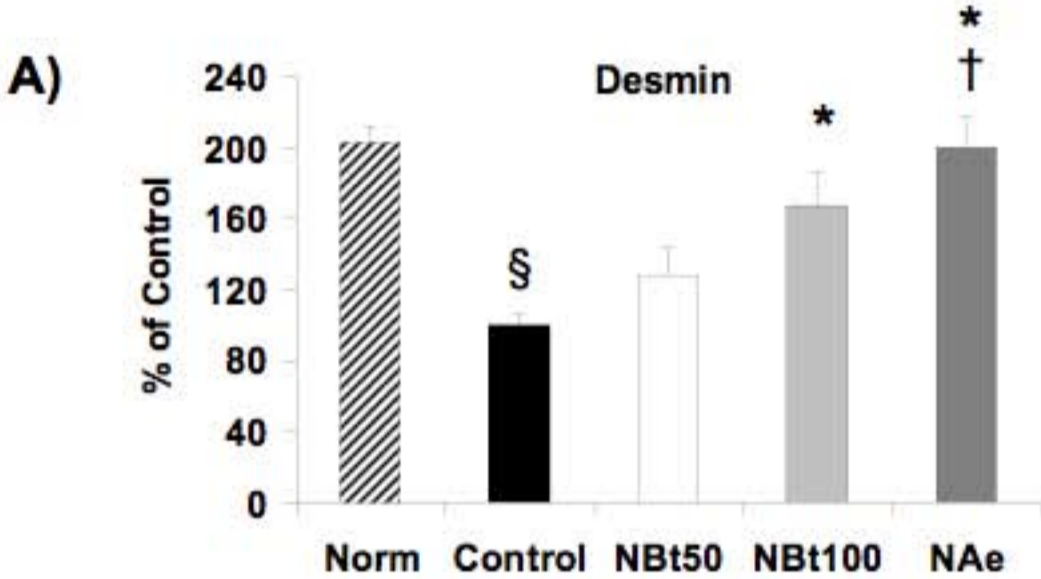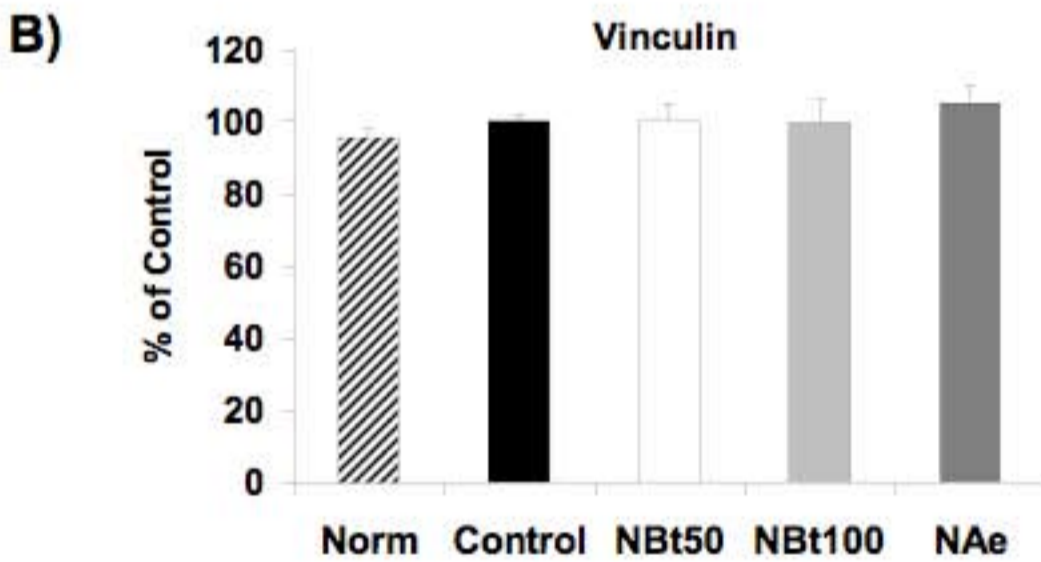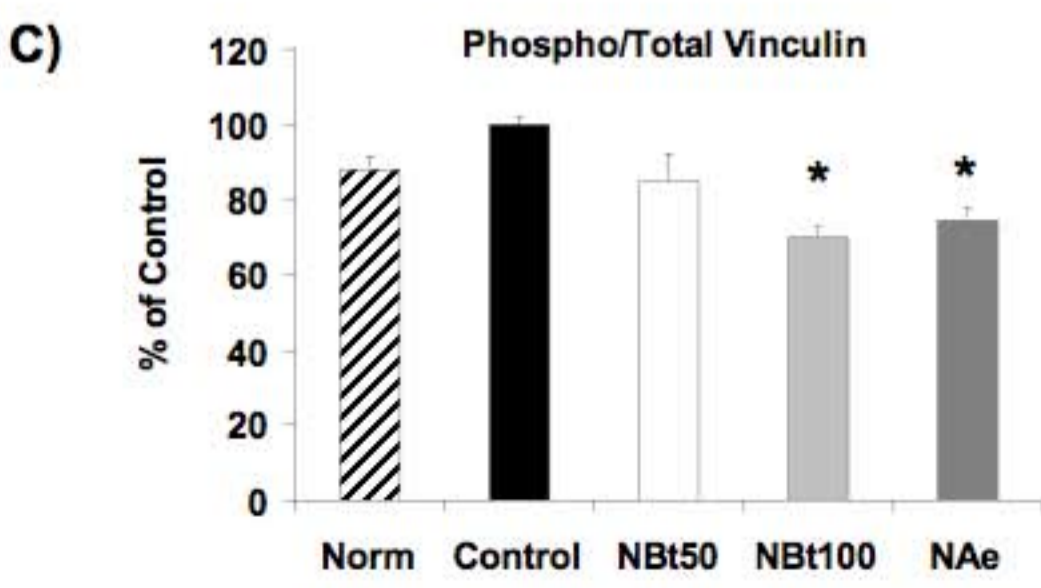

Supplement: figS5.pdf [file figS5.pdf]
